# Supplementary material
Source: ML conference proceedings conference paper supplement (https://openreview.net/forum?id=5jt0ZSA6Co)

Number of Problems Solved Against Time

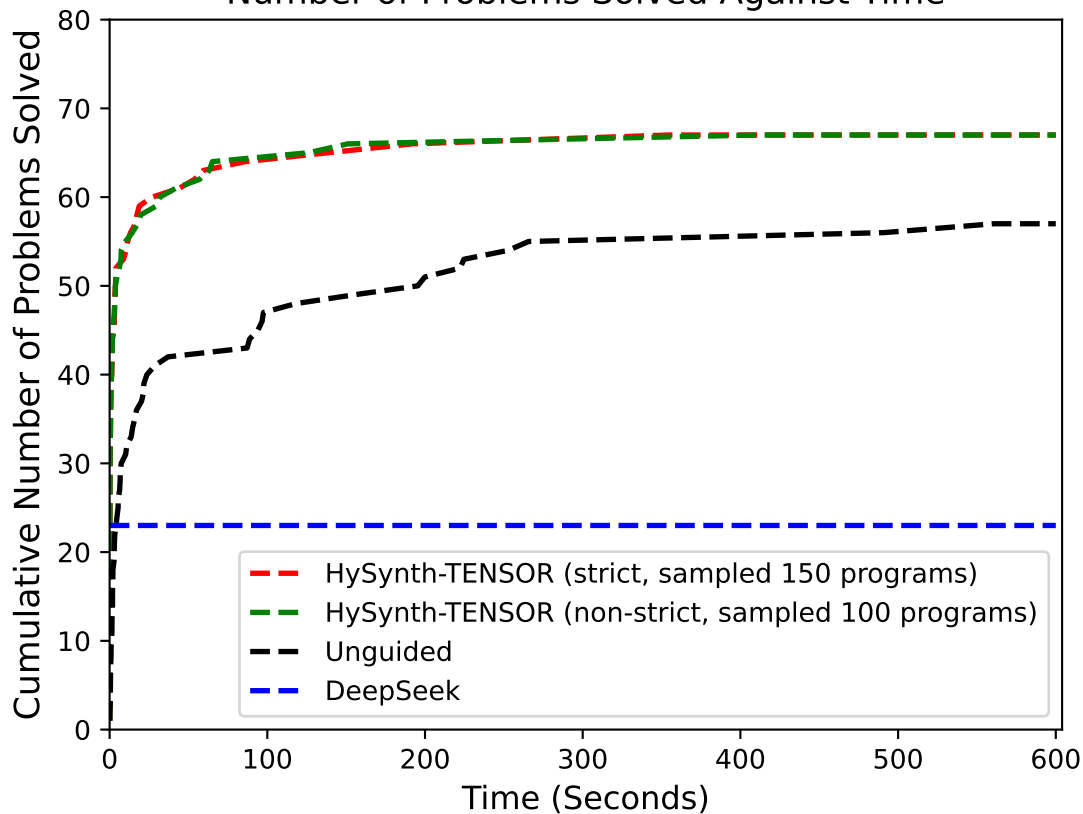

Supplement: supplementary_material [file attachment]
